# Supplementary material for: Overrepresentation of transcription factor families in the genesets underlying breast cancer subtypes
Source: PubMed Central journal article supplement (PMC3441847; doi:10.1186/1471-2164-13-199), 2012-05-22
Supplement: 1471-2164-13-199-S1.pdf [file 1471-2164-13-199-S1.pdf]

**Supplementary Table 1: Table shows the 197 subtype-specific best discriminatory genes, which is a subset of the intrinsic gene-list.**

| Subtype          | Name                                                                                                     | Symbol       |
|------------------|----------------------------------------------------------------------------------------------------------|--------------|
| <b>LUMINAL A</b> | Acyl-Coenzyme A dehydrogenase, short/branched chain                                                      | ACADSB       |
|                  | Adrenergic, alpha-2A-, receptor                                                                          | ADRA2A       |
|                  | Angiotensin II receptor, type 1                                                                          | AGTR1        |
|                  | Activated leukocyte cell adhesion molecule                                                               | ALCAM        |
|                  | Annexin A9                                                                                               | ANXA9        |
|                  | N-acylsphingosine amidohydrolase (acid ceramidase) 1                                                     | ASAH1        |
|                  | Beclin 1, autophagy related                                                                              | BECN1        |
|                  | Complement factor B                                                                                      | CFB          |
|                  | Biliverdin reductase A                                                                                   | BLVRA        |
|                  | Chromosome 14 open reading frame 132                                                                     | C14orf132    |
|                  | Complement component 4B (Childo blood group)                                                             | C4A          |
|                  | Calcium/calmodulin-dependent protein kinase II inhibitor 1                                               | CAMK2N1      |
|                  | Cyclin D1                                                                                                | CCND1        |
|                  | Cytochrome c oxidase subunit VIc                                                                         | COX6C        |
|                  | Carnitine acetyltransferase                                                                              | CRAT         |
|                  | Cytochrome b5 type A (microsomal)                                                                        | CYB5A        |
|                  | Cytochrome P450, family 2, subfamily A, polypeptide 6                                                    | CYP2A6       |
|                  | Adaptor protein, phosphotyrosine interaction, PH domain and leucine zipper containing 2                  | APPL2        |
|                  | Receptor accessory protein 5                                                                             | REEP5        |
|                  | Ectonucleotide pyrophosphatase/phosphodiesterase 5 (putative function)                                   | ENPP5        |
|                  | Estrogen receptor 1                                                                                      | ESR1         |
|                  | Fructose-1,6-bisphosphatase 1                                                                            | FBP1         |
|                  | Enoyl Coenzyme A hydratase domain containing 2                                                           | ECHDC2       |
|                  | Acyl-Coenzyme A binding domain containing 4                                                              | ACBD4        |
|                  | Fms-related tyrosine kinase 1 (vascular endothelial growth factor/vascular permeability factor receptor) | FLT1         |
|                  | Flavin containing monooxygenase 5                                                                        | FMO5         |
|                  | Fibromodulin                                                                                             | FMOD         |
|                  | Forkhead box A1                                                                                          | FOXA1        |
|                  | UDP-N-acetyl-alpha-D-galactosamine:polypeptide N-acetylgalactosaminyltransferase 10 (GalNAc-T10)         | GALNT10      |
|                  | GATA binding protein 3                                                                                   | GATA3        |
|                  | Glucocorticoid receptor DNA binding factor 1                                                             | GRLF1        |
|                  | Glutathione S-transferase M3 (brain)                                                                     | GSTM3        |
|                  | Hexamethylene bis-acetamide inducible 1                                                                  | HEXIM1       |
|                  | Hydroxysteroid (17-beta) dehydrogenase 4                                                                 | HSD17B4      |
|                  | KIAA0182                                                                                                 | KIAA0182     |
|                  | PHD finger protein 15                                                                                    | PHF15        |
|                  | Jumonji domain containing 2B                                                                             | JMJD2B       |
|                  | Mediator complex subunit 13-like                                                                         | MED13L       |
|                  | Solute carrier family 39 (zinc transporter), member 6                                                    | SLC39A6      |
|                  | Nephronectin                                                                                             | NPNT         |
|                  | LPS-responsive vesicle trafficking, beach and anchor containing                                          | LRBA         |
|                  | Basal cell adhesion molecule (Lutheran blood group)                                                      | BCAM         |
|                  | Methylcrotonoyl-Coenzyme A carboxylase 2 (beta)                                                          | MCCC2        |
|                  | Chromosome 10 open reading frame 32                                                                      | C10orf32     |
|                  | Sushi, nidogen and EGF-like domains 1                                                                    | SNED1        |
|                  | Mahogunin, ring finger 1                                                                                 | MGRN1        |
|                  | Msh homeobox 2                                                                                           | MSX2         |
|                  | Mucin 1, cell surface associated                                                                         | MUC1         |
|                  | N-acetyltransferase 1 (arylamine N-acetyltransferase)                                                    | NAT1         |
|                  | Transcribed locus                                                                                        | IMAGE:132012 |
|                  | Neuropeptide Y receptor Y1                                                                               | NPY1R        |
|                  | Plasminogen activator, tissue                                                                            | PLAT         |
|                  | Sushi, von Willebrand factor type A, EGF and pentraxin domain containing 1                               | SVEP1        |

| Subtype          | Name                                                                                                  | Symbol   |
|------------------|-------------------------------------------------------------------------------------------------------|----------|
|                  | protein tyrosine phosphatase type IVA, member 2                                                       | PTP4A2   |
|                  | Protein tyrosine phosphatase, receptor type, N polypeptide 2                                          | PTPRN2   |
|                  | Quinoid dihydropteridine reductase                                                                    | QDPR     |
|                  | Rabaptin, RAB GTPase binding effector protein 1                                                       | RABEP1   |
|                  | Ral GEF with PH domain and SH3 binding motif 1                                                        | RALGPS1  |
|                  | Retinoic acid receptor responder (tazarotene induced) 3                                               | RARRES3  |
|                  | RAS-like, estrogen-regulated, growth inhibitor                                                        | REERG    |
|                  | Transcribed locus, strongly similar to NP_003608.1 regulator of G-protein signalling 5 [Homo sapiens] | BU521978 |
|                  | Sodium channel, nonvoltage-gated 1 alpha                                                              | SCNN1A   |
|                  | Signal peptide, CUB domain, EGF-like 2                                                                | SCUBE2   |
|                  | Selenium binding protein 1                                                                            | SELENBP1 |
|                  | Seven in absentia homolog 2 (Drosophila)                                                              | SIAH2    |
|                  | Solute carrier family 40 (iron-regulated transporter), member 1                                       | SLC40A1  |
|                  | SHC (Src homology 2 domain containing) transforming protein 2                                         | SHC2     |
|                  | Six transmembrane epithelial antigen of the prostate 2                                                | STEAP2   |
|                  | Transcription elongation factor A (SII), 3                                                            | TCEA3    |
|                  | Transcription elongation factor A (SII)-like 1                                                        | TCEAL1   |
|                  | Trefoil factor 3 (intestinal)                                                                         | TFF3     |
|                  | Transducin-like enhancer of split 3 (E(sp1) homolog, Drosophila)                                      | TLE3     |
|                  | Vav 3 guanine nucleotide exchange factor                                                              | VAV3     |
|                  | X-box binding protein 1                                                                               | XBP1     |
|                  | MRNA; cDNA DKFZp434E033 (from clone DKFZp434E033)                                                     | AL080130 |
|                  | Sorting nexin 13                                                                                      | SNX13    |
|                  | Endothelin converting enzyme 1                                                                        | ECE1     |
|                  | Chromosome 4 open reading frame 18                                                                    | C4orf18  |
| <b>LUMINAL B</b> | Glycine dehydrogenase (decarboxylating)                                                               | GLDC     |
|                  | Syndecan 2                                                                                            | SDC2     |
|                  | Glutathione S-transferase pi                                                                          | GSTP1    |
|                  | Minichromosome maintenance complex component 3                                                        | MCM3     |
|                  | Procollagen-lysine 1, 2-oxoglutarate 5-dioxygenase 1                                                  | PLOD1    |
|                  | Serpin peptidase inhibitor, clade H (heat shock protein 47), member 1, (collagen binding protein 1)   | SERPINH1 |
|                  | PTK7 protein tyrosine kinase 7                                                                        | PTK7     |
|                  | Neuregulin 1                                                                                          | NRG1     |
|                  | Prolyl endopeptidase                                                                                  | PREP     |
|                  | Replication factor C (activator 1) 3, 38kDa                                                           | RFC3     |
|                  | NIMA (never in mitosis gene a)-related kinase 4                                                       | NEK4     |
|                  | Ribosomal protein L10                                                                                 | RPL10    |
|                  | THAP domain containing 11                                                                             | THAP11   |
|                  | Succinate dehydrogenase complex, subunit A, flavoprotein (Fp)                                         | SDHA     |
|                  | Transmembrane protein 65                                                                              | TMEM65   |
|                  | Chromosome 18 open reading frame 21                                                                   | C18orf21 |
|                  | CDGSH iron sulfur domain 1                                                                            | CISD1    |
|                  | CLP1, cleavage and polyadenylation factor I subunit, homolog (S. cerevisiae)                          | CLP1     |
|                  | ATP-binding cassette, sub-family D (ALD), member 3                                                    | ABCD3    |
|                  | Adenylosuccinate lyase                                                                                | ADSL     |
|                  | BTG family, member 3                                                                                  | BTG3     |
|                  | ATP synthase, H+ transporting, mitochondrial F0 complex, subunit C1 (subunit 9)                       | ATP5G1   |
|                  | Cell division cycle 123 homolog (S. cerevisiae)                                                       | CDC123   |
|                  | Prion protein interacting protein                                                                     | PRNP1P   |
|                  | EBNA1 binding protein 2                                                                               | EBNA1BP2 |
|                  | Transcribed locus, strongly similar to NP_113751.3 Y box protein 1 [Rattus norvegicus]                | BM555523 |
|                  | Gamma-glutamyl hydrolase (conjugase, foylpolgamma glutamyl hydrolase)                                 | GGH      |
|                  | Lysosomal associated protein transmembrane 4 beta                                                     | LAPTM4B  |
|                  | Peroxisome oxidin 4                                                                                   | PRDX4    |
|                  | Cornichon homolog 4 (Drosophila)                                                                      | CNIH4    |

| Subtype            | Name                                                                                                                   | Symbol       |
|--------------------|------------------------------------------------------------------------------------------------------------------------|--------------|
|                    | Glycyl-tRNA synthetase                                                                                                 | GARS         |
|                    | 5'-nucleotidase domain containing 2                                                                                    | NT5DC2       |
|                    | Thymosin beta 10                                                                                                       | TMSB10       |
|                    | KDEL (Lys-Asp-Glu-Leu) endoplasmic reticulum protein retention receptor 2                                              | KDELR2       |
|                    | Tweety homolog 3 ( <i>Drosophila</i> )                                                                                 | TTYH3        |
|                    | Nuclear receptor binding factor 2                                                                                      | NRBF2        |
|                    | Transcribed locus                                                                                                      | AL576538     |
|                    | Acidic (leucine-rich) nuclear phosphoprotein 32 family, member E                                                       | ANP32E       |
|                    | Polymerase (RNA) II (DNA directed) polypeptide F                                                                       | POLR2F       |
|                    | Squalene epoxidase                                                                                                     | SQLE         |
|                    | S100 calcium binding protein A10                                                                                       | S100A10      |
|                    | ASF1 anti-silencing function 1 homolog A ( <i>S. cerevisiae</i> )                                                      | ASF1A        |
|                    | Ladinin 1                                                                                                              | LAD1         |
|                    | Serine/threonine kinase 24 (STE20 homolog, yeast)                                                                      | STK24        |
|                    | V-maf musculoaponeurotic fibrosarcoma oncogene homolog G (avian)                                                       | MAFG         |
|                    | CTP synthase                                                                                                           | CTPS         |
|                    | Thymosin beta15b                                                                                                       | MGC39900     |
|                    | Cullin 1                                                                                                               | CUL1         |
|                    | Tumor protein p53 binding protein, 2                                                                                   | TP53BP2      |
|                    | Carbonyl reductase 1                                                                                                   | CBR1         |
|                    | ADAM metallopeptidase domain 9 (meltrin gamma)                                                                         | ADAM9        |
|                    | Transcribed locus                                                                                                      | BU167807     |
|                    | Protein tyrosine phosphatase, receptor type, K                                                                         | PTPRK        |
|                    | S100 calcium binding protein A11                                                                                       | S100A11      |
|                    | Calcium and integrin binding family member 2                                                                           | CIB2         |
| <b>NORMAL-LIKE</b> | Rap guanine nucleotide exchange factor (GEF) 3                                                                         | RAPGEF3      |
|                    | Acyl-CoA synthetase short-chain family member 2                                                                        | ACSS2        |
|                    | RAB11 family interacting protein 5 (class I)                                                                           | RAB11FIP5    |
|                    | Trophoblast-derived noncoding RNA                                                                                      | TncRNA       |
|                    | Phosphoinositide-3-kinase, regulatory subunit 1 (alpha)                                                                | PIK3R1       |
|                    | Aldo-keto reductase family 1, member C1 (dihydrodiol dehydrogenase 1; 20-alpha (3-alpha)-hydroxysteroid dehydrogenase) | AKR1C1       |
|                    | Acyl-CoA synthetase long-chain family member 1                                                                         | ACSL1        |
|                    | Peptidylglycine alpha-amidating monoxygenase                                                                           | PAM          |
|                    | Hypothetical LOC653354                                                                                                 | LOC653354    |
|                    | Guanine nucleotide binding protein (G protein), beta polypeptide 2-like 1                                              | GNB2L1       |
|                    | HCG18290                                                                                                               | hCG_18290    |
|                    | Invasion inhibitory protein 45                                                                                         | RP5-1077B9.4 |
|                    | Transcribed locus                                                                                                      | BG696892     |
|                    | Protein tyrosine phosphatase, receptor type, M                                                                         | PTPRM        |
|                    | Lactotransferrin                                                                                                       | LTF          |
|                    | Aquaporin 3 (Gill blood group)                                                                                         | AQP3         |
|                    | Actin binding LIM protein 1                                                                                            | ABLIM1       |
|                    | Transcribed locus                                                                                                      | AI546919     |
|                    | Glutathione S-transferase A4                                                                                           | GSTA4        |
|                    |                                                                                                                        | IMAGE:161998 |
|                    | Keratin 13                                                                                                             | KRT13        |
|                    | Transcription factor AP-2 gamma (activating enhancer binding protein 2 gamma)                                          | TFAP2C       |
|                    | Carbonic anhydrase II                                                                                                  | CA2          |
| <b>BASAL</b>       | Exostoses (multiple) 2                                                                                                 | EXT2         |
|                    | Zinc finger protein 532                                                                                                | ZNF532       |
|                    | Cyclin-dependent kinase 6                                                                                              | CDK6         |
|                    | CDNA clone IMAGE:3683736                                                                                               | BX647680     |
|                    | Chemokine (C-X-C motif) ligand 1 (melanoma growth stimulating activity, alpha)                                         | CXCL1        |
|                    | Cadherin 3, type 1, P-cadherin (placental)                                                                             | CDH3         |
|                    | Secretory leukocyte peptidase inhibitor                                                                                | SLPI         |
|                    | Vestigial like 1 ( <i>Drosophila</i> )                                                                                 | VGLL1        |

| Subtype       | Name                                                                                                           | Symbol   |
|---------------|----------------------------------------------------------------------------------------------------------------|----------|
|               | Gamma-aminobutyric acid (GABA) A receptor, pi                                                                  | GABRP    |
|               | Annexin A8-like 1                                                                                              | ANXA8L1  |
|               | Keratin 5 (epidermolysis bullosa simplex, Dowling-Meara/Kobner/Weber-Cockayne types)                           | KRT5     |
|               | Tripartite motif-containing 29                                                                                 | TRIM29   |
|               | Keratin 17                                                                                                     | KRT17    |
|               | Milk fat globule-EGF factor 8 protein                                                                          | MFGE8    |
|               | Milk fat globule-EGF factor 8 protein                                                                          | MFGE8    |
|               | Chemokine (C-X3-C motif) ligand 1                                                                              | CX3CL1   |
|               | Frizzled homolog 7 (Drosophila)                                                                                | FZD7     |
|               | Forkhead box C1                                                                                                | FOXC1    |
|               | Chitinase 3-like 2                                                                                             | CHI3L2   |
|               | Desmocollin 2                                                                                                  | DSC2     |
|               | Chromosome 1 open reading frame 198                                                                            | C1orf198 |
|               | UDP-GlcNAc:betaGal beta-1,3-N-acetylglucosaminyltransferase 5                                                  | B3GNT5   |
|               | Solute carrier family 5 (sodium-dependent vitamin transporter), member 6                                       | SLC5A6   |
|               | 3-ketodihydrospingosine reductase                                                                              | KDSR     |
|               | Nucleolin                                                                                                      | NCL      |
|               | Actin, gamma 2, smooth muscle, enteric                                                                         | ACTG2    |
|               | Vinculin                                                                                                       | VCL      |
|               | Sarcoglycan, epsilon                                                                                           | SGCE     |
| <b>ERBB2+</b> | Chromosome 17 open reading frame 63                                                                            | C17orf63 |
|               | Flotillin 2                                                                                                    | FLOT2    |
|               | SWI/SNF related, matrix associated, actin dependent regulator of chromatin, subfamily e, member 1              | SMARCE1  |
|               | Tousled-like kinase 1                                                                                          | TLK1     |
|               | Mediator complex subunit 24                                                                                    | MED24    |
|               | Transcribed locus                                                                                              | BM455010 |
|               | V-erb-b2 erythroblastic leukemia viral oncogene homolog 2, neuro/glioblastoma derived oncogene homolog (avian) | ERBB2    |
|               | Growth factor receptor-bound protein 7                                                                         | GRB7     |
|               | StAR-related lipid transfer (START) domain containing 3                                                        | STARD3   |
|               | TBP-like 1                                                                                                     | TBPL1    |
|               | Carcinoembryonic antigen-related cell adhesion molecule 6 (non-specific cross reacting antigen)                | CEACAM6  |
|               | S100 calcium binding protein P                                                                                 | S100P    |
|               | Hypothetical protein LOC90110                                                                                  | LOC90110 |
