# Supplementary material for: Overrepresentation of transcription factor families in the genesets underlying breast cancer subtypes
Source: PubMed Central journal article supplement (PMC3441847; doi:10.1186/1471-2164-13-199), 2012-05-22

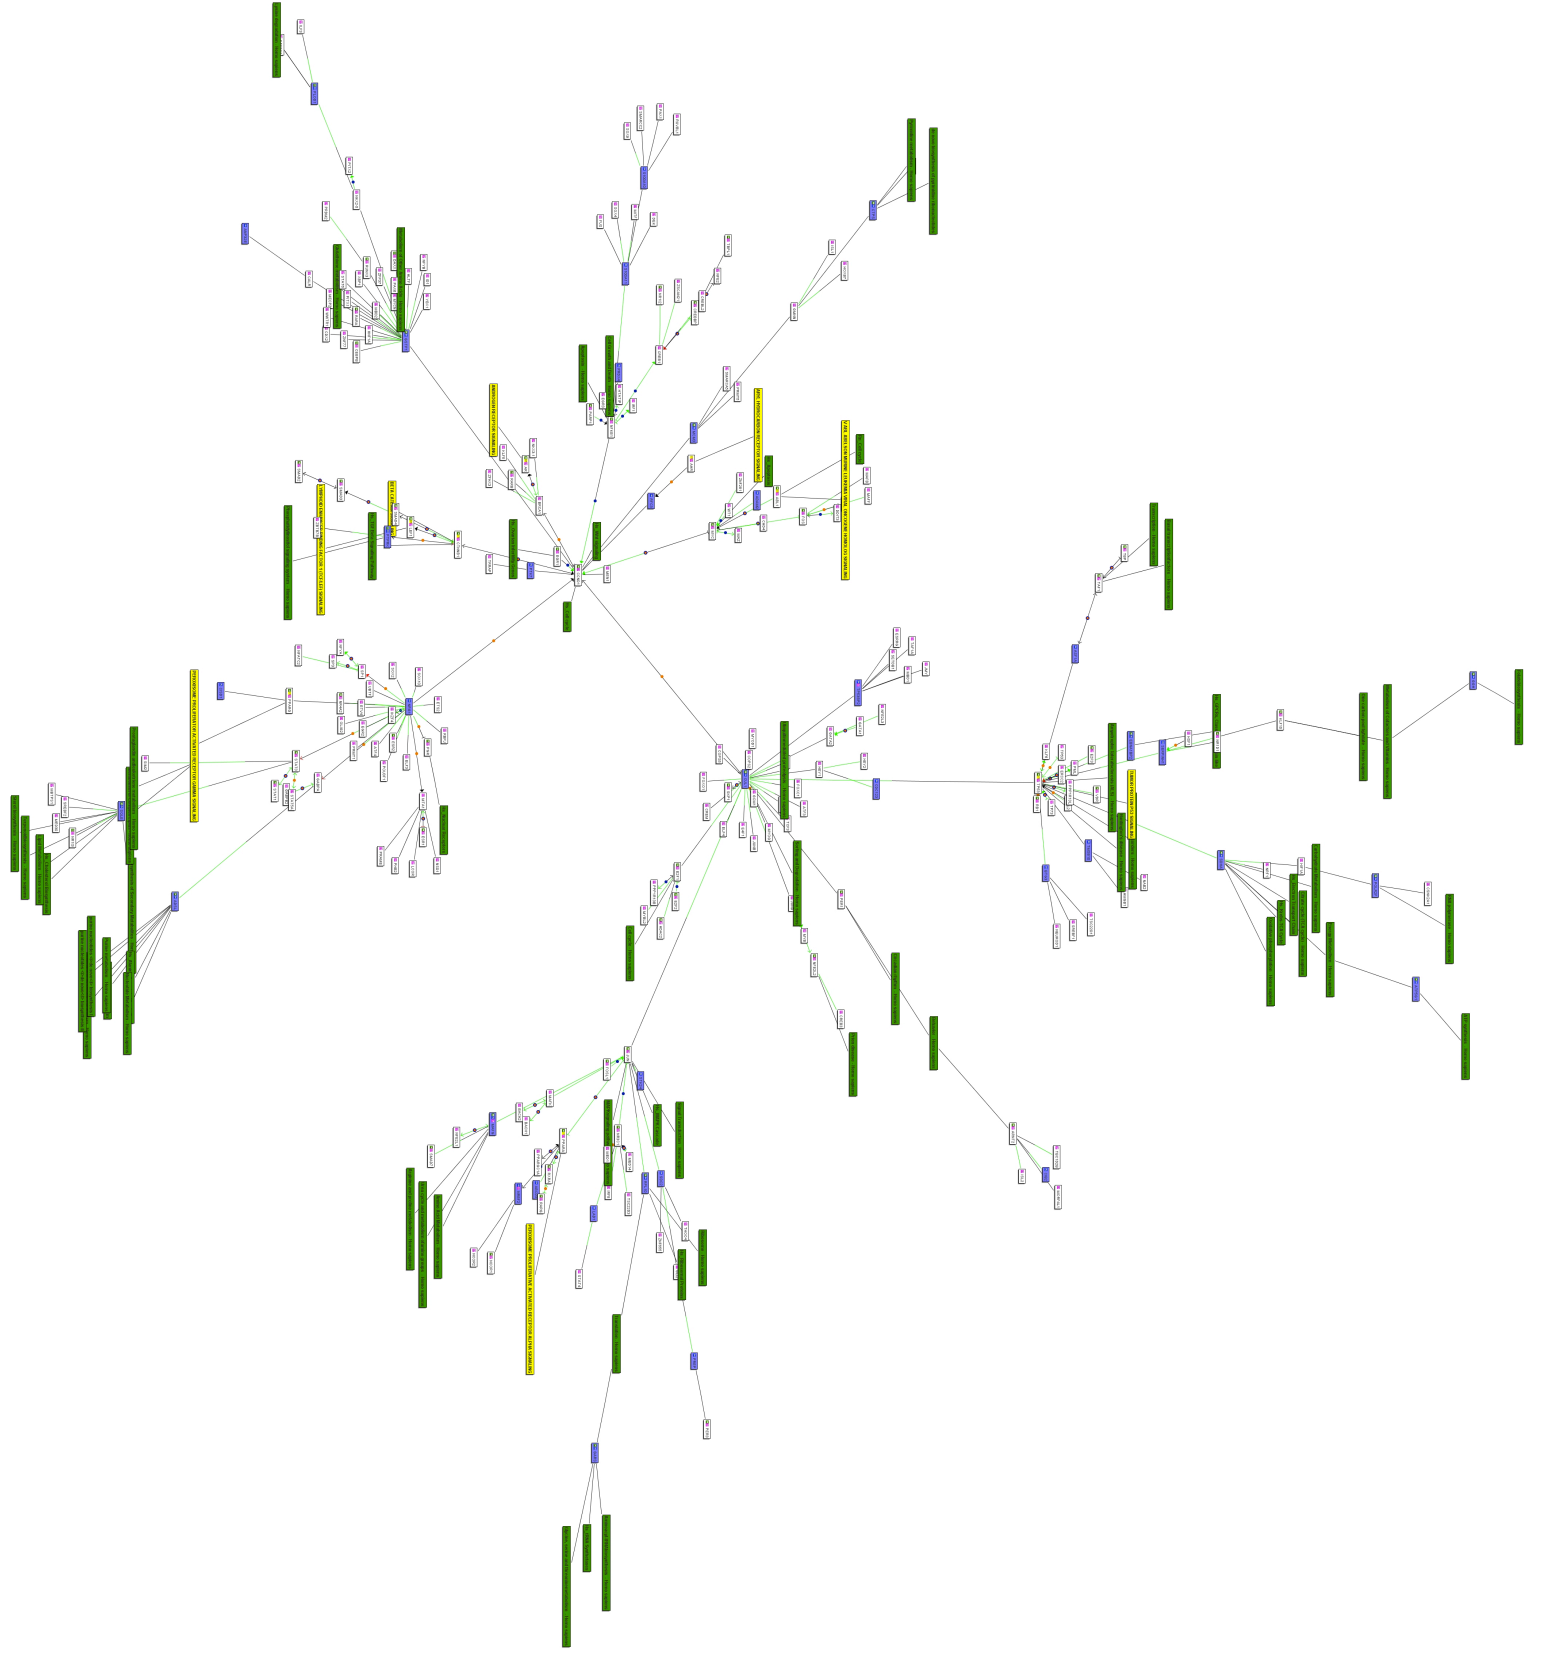

Supplement: 1471-2164-13-199-S5.pdf [file 1471-2164-13-199-S5.pdf]
