# Supplementary material for: Overrepresentation of transcription factor families in the genesets underlying breast cancer subtypes
Source: PubMed Central journal article supplement (PMC3441847; doi:10.1186/1471-2164-13-199), 2012-05-22
Supplement: 1471-2164-13-199-S9.pdf [file 1471-2164-13-199-S9.pdf]

Supplementary Table 2. List of significantly over-represented transcription factor binding site families in subtypes of breast cancers at the cut-off level of z-score  $\geq 2.0$ .

| TF Families      | Description                                                                                       | Nr of Sequences | Nr of Matches | Expected frequency (genome) | Overrepresentation (genome) | Z-Score (genome) | Expected (promoters) | Overrepresentation (promoters) | Z-Score (promoters) |
|------------------|---------------------------------------------------------------------------------------------------|-----------------|---------------|-----------------------------|-----------------------------|------------------|----------------------|--------------------------------|---------------------|
| <b>Basal</b>     |                                                                                                   |                 |               |                             |                             |                  |                      |                                |                     |
| O\$TF2B          | RNA polymerase II transcription factor II B                                                       | 6               | 12            | 0.82                        | 14.71                       | 11.83            | 6.35                 | 1.89                           | 2.04                |
| V\$BTBF          | BTB/POZ (broad complex, TramTrack, Bric-a-brac/pox viruses and zinc fingers) transcription factor | 12              | 14            | 4.51                        | 3.1                         | 4.23             | 4.38                 | 3.2                            | 4.36                |
| V\$MOKF          | Mouse Krueppel like factor                                                                        | 14              | 27            | 13.68                       | 1.97                        | 3.47             | 17.43                | 1.55                           | 2.17                |
| V\$SRFF          | Serum response element binding factor                                                             | 17              | 35            | 30.62                       | 1.14                        | 0.7              | 23.52                | 1.49                           | 2.27                |
| <b>ERBB2+</b>    |                                                                                                   |                 |               |                             |                             |                  |                      |                                |                     |
| V\$EKLF          | Basic and erythroid krueppel like factors                                                         | 10              | 30            | 6.85                        | 4.38                        | 8.66             | 17.35                | 1.73                           | 2.92                |
| V\$GREF          | Glucocorticoid responsive and related elements                                                    | 10              | 24            | 13.43                       | 1.79                        | 2.75             | 12.03                | 2                              | 3.31                |
| V\$MAZF          | Myc associated zinc fingers                                                                       | 11              | 32            | 4.55                        | 7.03                        | 12.64            | 16.12                | 1.98                           | 3.83                |
| V\$MZF1          | Myeloid zinc finger 1 factors                                                                     | 12              | 24            | 7.64                        | 3.14                        | 5.74             | 13.16                | 1.82                           | 2.85                |
| V\$NFKB          | Nuclear factor kappa B/c-rel                                                                      | 11              | 24            | 7.29                        | 3.29                        | 6                | 11.67                | 2.06                           | 3.46                |
| V\$PLAG          | Pleomorphic adenoma gene                                                                          | 8               | 16            | 2.37                        | 6.76                        | 8.54             | 8.5                  | 1.88                           | 2.4                 |
| V\$RREB          | Ras-responsive element binding protein                                                            | 10              | 13            | 3.62                        | 3.59                        | 4.67             | 6.83                 | 1.9                            | 2.17                |
| V\$SP1F          | GC-Box factors SP1/GC                                                                             | 11              | 58            | 9.03                        | 6.43                        | 16.15            | 28.47                | 2.04                           | 5.45                |
| V\$XBBF          | X-box binding factors                                                                             | 8               | 17            | 7.25                        | 2.35                        | 3.44             | 10.02                | 1.7                            | 2.05                |
| V\$ZBPF          | Zinc binding protein factors                                                                      | 11              | 63            | 8.96                        | 7.03                        | 17.9             | 32.93                | 1.91                           | 5.16                |
| <b>Luminal A</b> |                                                                                                   |                 |               |                             |                             |                  |                      |                                |                     |
| O\$INRE          | Core promoter initiator elements                                                                  | 39              | 54            | 53.92                       | 1                           | -0.06            | 40.17                | 1.34                           | 2.1                 |
| O\$MTEN          | Core promoter motif ten elements                                                                  | 33              | 75            | 9.52                        | 7.88                        | 21.07            | 57.01                | 1.32                           | 2.32                |
| O\$PTBP          | Plant TATA binding protein factor                                                                 | 22              | 110           | 114.22                      | 0.96                        | -0.44            | 54.75                | 2.01                           | 7.4                 |
| O\$XCPE          | Activator-, mediator- and TBP-dependent core promoter element for RNA polymerase                  | 39              | 72            | 9.72                        | 7.4                         | 19.81            | 55.89                | 1.29                           | 2.09                |
| V\$AP1F          | AP1, Activating protein 1                                                                         | 33              | 58            | 55.74                       | 1.04                        | 0.24             | 43.98                | 1.32                           | 2.04                |
| V\$ARID          | AT rich interactive domain factor                                                                 | 10              | 13            | 6.94                        | 1.87                        | 2.11             | 4.56                 | 2.85                           | 3.71                |
| V\$CLOX          | CLOX and CLOX homology (CDP) factors                                                              | 69              | 205           | 284.23                      | 0.72                        | -4.74            | 175.47               | 1.17                           | 2.19                |
| V\$EBOX          | E-box binding factors                                                                             | 61              | 123           | 56.47                       | 2.18                        | 8.79             | 98.34                | 1.25                           | 2.44                |
| V\$GATA          | GATA binding factors                                                                              | 68              | 168           | 205.78                      | 0.82                        | -2.67            | 135.12               | 1.24                           | 2.79                |
| V\$GLIF          | GLI zinc finger family                                                                            | 54              | 91            | 37.79                       | 2.41                        | 8.58             | 71.41                | 1.27                           | 2.26                |
| V\$HAML          | Human acute myelogenous leukemia factors                                                          | 41              | 51            | 39.04                       | 1.31                        | 1.83             | 36.88                | 1.38                           | 2.24                |
| V\$HNF1          | Hepatic Nuclear Factor 1                                                                          | 45              | 94            | 119.4                       | 0.79                        | -2.37            | 71.19                | 1.32                           | 2.65                |
| V\$HOXF          | Factors with moderate activity to homeo domain consensus sequence                                 | 80              | 348           | 482.2                       | 0.72                        | -6.16            | 301.07               | 1.16                           | 2.68                |

| TF Families | Description                                                                                                  | Nr of Sequences | Nr of Matches | Expected frequency (genome) | Overrepresentation (genome) | Z-Score (genome) | Expected (promoters) | Overrepresentation (promoters) | Z-Score (promoters) |
|-------------|--------------------------------------------------------------------------------------------------------------|-----------------|---------------|-----------------------------|-----------------------------|------------------|----------------------|--------------------------------|---------------------|
| V\$IRFF     | Interferon regulatory factors                                                                                | 62              | 125           | 135.18                      | 0.92                        | -0.92            | 100.89               | 1.24                           | 2.35                |
| V\$LHXF     | Lim homeodomain factors                                                                                      | 47              | 116           | 172.53                      | 0.67                        | -4.35            | 92.05                | 1.26                           | 2.45                |
| V\$MAZF     | Myc associated zinc fingers                                                                                  | 52              | 135           | 31.5                        | 4.29                        | 18.36            | 111.63               | 1.21                           | 2.17                |
| V\$MEF3     | MEF3 binding sites                                                                                           | 15              | 17            | 8.53                        | 1.99                        | 2.73             | 10.12                | 1.68                           | 2                   |
| V\$MYT1     | MYT1 C2HC zinc finger protein                                                                                | 67              | 157           | 178.33                      | 0.88                        | -1.64            | 125.66               | 1.25                           | 2.75                |
| V\$OAZF     | Olfactory associated zinc finger protein                                                                     | 28              | 54            | 13.73                       | 3.93                        | 10.73            | 28.11                | 1.92                           | 4.79                |
| V\$P53F     | p53 tumor suppressor                                                                                         | 44              | 89            | 64.02                       | 1.39                        | 3.06             | 71.54                | 1.24                           | 2.01                |
| V\$PARF     | PAR/bZIP family                                                                                              | 62              | 182           | 233.26                      | 0.78                        | -3.4             | 148.77               | 1.22                           | 2.69                |
| V\$PAX9     | PAX-9 binding sites                                                                                          | 21              | 28            | 5.66                        | 4.95                        | 9.18             | 17.12                | 1.64                           | 2.51                |
| V\$PLZF     | C2H2 zinc finger protein PLZF                                                                                | 34              | 48            | 42.96                       | 1.12                        | 0.69             | 30.25                | 1.59                           | 3.14                |
| V\$SF1F     | Vertebrate steroidogenic factor                                                                              | 39              | 45            | 31.8                        | 1.42                        | 2.25             | 32.82                | 1.37                           | 2.04                |
| V\$SP1F     | GC-Box factors SP1/GC                                                                                        | 62              | 230           | 62.48                       | 3.68                        | 21.14            | 197.13               | 1.17                           | 2.31                |
| V\$ZBPF     | Zinc binding protein factors                                                                                 | 58              | 273           | 62.02                       | 4.4                         | 26.74            | 228                  | 1.2                            | 2.95                |
| V\$ZF5F     | ZF5 POZ domain zinc finger                                                                                   | 26              | 83            | 7.24                        | 11.47                       | 27.98            | 57.06                | 1.45                           | 3.37                |
| Luminal B   |                                                                                                              |                 |               |                             |                             |                  |                      |                                |                     |
| O\$MTEN     | Core promoter motif ten elements                                                                             | 26              | 63            | 5.82                        | 10.83                       | 23.51            | 34.84                | 1.81                           | 4.69                |
| O\$TF2B     | RNA polymerase II transcription factor II B                                                                  | 18              | 28            | 1.6                         | 17.47                       | 20.46            | 12.47                | 2.24                           | 4.26                |
| O\$XCPE     | Activator-, mediator- and TBP-dependent core promoter element for RNA polymerase II from TATA-less promoters | 26              | 58            | 5.94                        | 9.76                        | 21.15            | 34.15                | 1.7                            | 4                   |
| V\$AHRR     | AHR-arnt heterodimers and AHR-related factors                                                                | 30              | 65            | 16.83                       | 3.86                        | 11.62            | 38.04                | 1.71                           | 4.29                |
| V\$CDEF     | Cell cycle regulators: Cell cycle dependent element                                                          | 20              | 32            | 2.42                        | 13.22                       | 18.69            | 16.37                | 1.95                           | 3.74                |
| V\$CTCF     | CTCF and BORIS gene family, transcriptional regulators with 11 highly conserved zinc finger domains          | 26              | 71            | 5.08                        | 13.98                       | 29.03            | 40.98                | 1.73                           | 4.61                |
| V\$E2FF     | E2F-myc activator/cell cycle regulator                                                                       | 44              | 159           | 43.69                       | 3.64                        | 17.38            | 85.2                 | 1.87                           | 7.95                |
| V\$EGRF     | EGR/nerve growth factor induced protein C & related factors                                                  | 37              | 224           | 35.37                       | 6.33                        | 31.65            | 133.2                | 1.68                           | 7.84                |
| V\$EKLF     | Basic and erythroid krueppel like factors                                                                    | 37              | 96            | 28.98                       | 3.31                        | 12.36            | 73.42                | 1.31                           | 2.58                |
| V\$MAZF     | Myc associated zinc fingers                                                                                  | 35              | 107           | 19.25                       | 5.56                        | 19.89            | 68.22                | 1.57                           | 4.64                |
| V\$NRF1     | Nuclear respiratory factor 1                                                                                 | 23              | 121           | 3.24                        | 37.33                       | 65.13            | 51.11                | 2.37                           | 9.71                |
| V\$PAX1     | PAX-1 binding sites                                                                                          | 11              | 11            | 4.75                        | 2.32                        | 2.64             | 5.24                 | 2.1                            | 2.3                 |
| V\$PAX9     | PAX-9 binding sites                                                                                          | 14              | 19            | 3.46                        | 5.5                         | 8.09             | 10.46                | 1.82                           | 2.48                |
| V\$PLAG     | Pleomorphic adenoma gene                                                                                     | 29              | 61            | 10.02                       | 6.09                        | 15.95            | 35.98                | 1.7                            | 4.09                |
| V\$SP1F     | GC-Box factors SP1/GC                                                                                        | 37              | 166           | 38.18                       | 4.35                        | 20.62            | 120.47               | 1.38                           | 4.11                |
| V\$WHNF     | Winged helix binding sites                                                                                   | 21              | 30            | 4.65                        | 6.45                        | 11.52            | 18.88                | 1.59                           | 2.44                |
| V\$XBBF     | X-box binding factors                                                                                        | 32              | 58            | 30.67                       | 1.89                        | 4.85             | 42.4                 | 1.37                           | 2.32                |

| TF Families        | Description                  | Nr of Sequences | Nr of Matches | Expected frequency (genome) | Overrepresentation (genome) | Z-Score (genome) | Expected (promoters) | Overrepresentation (promoters) | Z-Score (promoters) |
|--------------------|------------------------------|-----------------|---------------|-----------------------------|-----------------------------|------------------|----------------------|--------------------------------|---------------------|
| V\$ZBPF            | Zinc binding protein factors | 37              | 207           | 37.9                        | 5.46                        | 27.4             | 139.33               | 1.49                           | 5.7                 |
| V\$ZF5F            | ZF5 POZ domain zinc finger   | 25              | 70            | 4.42                        | 15.83                       | 30.95            | 34.87                | 2.01                           | 5.87                |
| <b>Normal-like</b> |                              |                 |               |                             |                             |                  |                      |                                |                     |
| V\$NRF1            | Nuclear respiratory factor 1 | 6               | 28            | 1.18                        | 23.76                       | 24.25            | 18.58                | 1.51                           | 2.07                |
