# Supplementary material for: Overrepresentation of transcription factor families in the genesets underlying breast cancer subtypes
Source: PubMed Central journal article supplement (PMC3441847; doi:10.1186/1471-2164-13-199), 2012-05-22
Supplement: 1471-2164-13-199-S10.pdf [file 1471-2164-13-199-S10.pdf]

Supplementary Table 3: Table shows the fold over-representation of potential transcriptional factor hits (represented as TFBS families) in subtype-specific gene promoter sequences.

| TFBSFamilyName | Basal | ERBB2+ | LumA | LumB | Normal-like |
|----------------|-------|--------|------|------|-------------|
| O\$INRE        | 1.04  | 0.69   | 1.34 | 0.65 | 1.23        |
| O\$MTEN        | 1.47  | 0.85   | 1.32 | 1.81 | 0.87        |
| O\$PTBP        | 0.94  | 0.51   | 2.01 | 0.6  | 1.07        |
| O\$TF2B        | 1.89  | 0.34   | 0.98 | 2.24 | 1.32        |
| O\$TF2D        | 0.81  | 1.32   | 0.95 | 1.35 | 0.86        |
| O\$TF3C        | 0.67  | 0      | 0.83 | 1.36 | 0           |
| O\$VTBP        | 1.24  | 0.75   | 1.03 | 0.98 | 1.28        |
| O\$XCPE        | 0.86  | 1.61   | 1.29 | 1.7  | 1.05        |
| V\$AARF        | 0.84  | 0.6    | 0.95 | 0.99 | 1.17        |
| V\$AHRR        | 0.72  | 0.78   | 0.85 | 1.71 | 0.87        |
| V\$AIRE        | 0.75  | 0.81   | 1.11 | 1.05 | 1.05        |
| V\$AP1F        | 1.24  | 0.47   | 1.32 | 0.52 | 1.33        |
| V\$AP1R        | 0.93  | 0.71   | 0.97 | 0.75 | 1.07        |
| V\$AP2F        | 0.87  | 1.19   | 1.3  | 1.21 | 1.55        |
| V\$AP4R        | 0.6   | 0.64   | 1.06 | 1.12 | 0.42        |
| V\$ARID        | 0.7   | 1.52   | 2.85 | 0.36 | 0           |
| V\$ATBF        | 0.66  | 0.32   | 1.01 | 0.79 | 0.52        |
| V\$BARB        | 0.91  | 0.49   | 1.23 | 0.92 | 0.95        |
| V\$BCL6        | 0.82  | 0.95   | 1.12 | 1    | 1.24        |
| V\$BNCF        | 1.08  | 1.16   | 0.67 | 0.46 | 1.51        |
| V\$BPTF        | 1.24  | 1.14   | 0.66 | 0.54 | 0.74        |
| V\$BRAC        | 1.39  | 0.54   | 1.17 | 1.21 | 1.8         |
| V\$BRNF        | 0.86  | 0      | 1.08 | 0.99 | 0.96        |
| V\$BTBF        | 3.2   | 1.97   | 0.64 | 0.35 | 0.96        |
| V\$CAAT        | 0.82  | 0.73   | 1.18 | 1.26 | 1.1         |
| V\$CABL        | 1.02  | 0.73   | 0.63 | 0.87 | 0.48        |
| V\$CART        | 0.56  | 0.45   | 1.08 | 1.06 | 0.58        |
| V\$CDEF        | 0.72  | 0.78   | 0.75 | 1.95 | 0.67        |
| V\$CDXF        | 1.03  | 0.69   | 1.1  | 1.38 | 1.62        |
| V\$CEBP        | 1.23  | 0.63   | 1.07 | 1.16 | 0.82        |
| V\$CHOP        | 1.08  | 1.75   | 0.59 | 1.1  | 0           |
| V\$CHRE        | 0.8   | 0.69   | 0.7  | 1.31 | 1.12        |
| V\$CHRF        | 0.55  | 0.98   | 0.74 | 0.6  | 1.66        |
| V\$CIZF        | 0.84  | 0.9    | 1.07 | 0.85 | 1.32        |
| V\$CLOX        | 1.1   | 0.99   | 1.17 | 1.03 | 0.77        |
| V\$CP2F        | 1.51  | 1.37   | 1.01 | 0.85 | 0.67        |
| V\$CREB        | 0.75  | 1.02   | 0.98 | 0.93 | 0.98        |
| V\$CSEN        | 0.75  | 2.01   | 1.34 | 0.48 | 1.31        |
| V\$CTCF        | 1.05  | 1.34   | 1.15 | 1.73 | 1.07        |
| V\$DEAF        | 1.08  | 1.54   | 0.82 | 1.1  | 0.5         |
| V\$DICE        | 1.07  | 0.58   | 1.12 | 0.95 | 0.19        |
| V\$DMRT        | 0.86  | 0.77   | 1.13 | 0.99 | 0.58        |
| V\$DMTF        | 1.54  | 0.74   | 1.17 | 1.04 | 0.24        |
| V\$E2FF        | 0.88  | 0.6    | 0.97 | 1.87 | 0.71        |
| V\$E4FF        | 0.64  | 1.11   | 1    | 1.24 | 1.44        |
| V\$EBOX        | 0.69  | 0.84   | 1.25 | 1.11 | 0.69        |
| V\$EGRF        | 0.96  | 1.24   | 1.06 | 1.68 | 0.85        |
| V\$EKLF        | 1.12  | 1.73   | 0.99 | 1.31 | 0.75        |
| V\$EREF        | 0.87  | 1.53   | 0.96 | 1.01 | 1.11        |
| V\$ETSF        | 0.86  | 1.19   | 0.92 | 1.14 | 0.91        |
| V\$EVI1        | 0.71  | 0.75   | 0.92 | 1.09 | 1.18        |
| V\$FAST        | 0.82  | 1.23   | 0.77 | 0.74 | 0.97        |
| V\$FKHD        | 0.98  | 0.61   | 1.05 | 0.79 | 0.82        |
| V\$FXRE        | 0.7   | 0      | 1.04 | 0.81 | 1.97        |
| V\$GABF        | 0.16  | 1.59   | 1.17 | 0.92 | 0.11        |
| V\$GATA        | 1.09  | 0.72   | 1.24 | 0.91 | 0.9         |
| V\$GCMF        | 1.51  | 1.08   | 0.6  | 0.77 | 0.47        |
| V\$GCNR        | 0.69  | 0      | 0.43 | 0    | 0           |
| V\$GFI1        | 0.94  | 1.18   | 0.97 | 0.95 | 0.55        |
| V\$GKLF        | 0.84  | 1.47   | 0.88 | 1.02 | 0.88        |
| V\$GLIF        | 1.04  | 1.07   | 1.27 | 1.24 | 0.57        |
| V\$GREF        | 1.04  | 2      | 0.78 | 0.71 | 0.86        |
| V\$GRHL        | 0.77  | 0.71   | 0.65 | 0.68 | 0.93        |
| V\$GUCE        | 1.3   | 0      | 1.21 | 1.32 | 0           |
| V\$GZF1        | 0.64  | 0.69   | 1.34 | 0.57 | 0.67        |
| V\$HAML        | 1.22  | 1.5    | 1.38 | 1.06 | 0.73        |
| V\$HAND        | 0.85  | 1.1    | 1.08 | 0.94 | 0.79        |
| V\$HEAT        | 1.14  | 1.22   | 0.96 | 0.93 | 0.75        |
| V\$HESF        | 0.73  | 0.55   | 1.08 | 1.27 | 0.96        |
| V\$HICF        | 0.54  | 0.58   | 1.42 | 1.36 | 1.12        |
| V\$HIFF        | 0.55  | 0.88   | 0.98 | 1.11 | 1.24        |
| V\$HMTB        | 1.62  | 1.28   | 1.06 | 0.95 | 1.67        |
| V\$HNF1        | 0.68  | 0.39   | 1.32 | 0.8  | 1.07        |
| V\$HNF6        | 0.55  | 0.6    | 1.17 | 0.93 | 1.08        |
| V\$HOMF        | 0.76  | 0.73   | 1    | 0.84 | 1.01        |
| V\$HOXC        | 0.74  | 0.79   | 0.88 | 1.07 | 0.82        |
| V\$HOXF        | 0.84  | 0.92   | 1.16 | 0.9  | 0.87        |
| V\$HOXH        | 0.69  | 0.4    | 1.09 | 0.96 | 1.14        |
| V\$IKRS        | 1.09  | 0.65   | 1.13 | 1.05 | 0.76        |
| V\$INSM        | 1.31  | 1.56   | 0.88 | 1.03 | 1.52        |
| V\$IRFF        | 1.05  | 0.82   | 1.24 | 1.25 | 1.12        |

| TFBSFamilyName | Basal | ERBB2+ | LumA | LumB | Normal-like |
|----------------|-------|--------|------|------|-------------|
| V\$LEFF        | 0.92  | 0.93   | 0.86 | 1.03 | 1.29        |
| V\$LHXF        | 0.59  | 0.53   | 1.26 | 0.71 | 0.78        |
| V\$MAZF        | 0.98  | 1.98   | 1.21 | 1.57 | 0.93        |
| V\$MEF2        | 1.12  | 0.71   | 1.16 | 0.95 | 0.99        |
| V\$MEF3        | 1.9   | 1.37   | 1.68 | 1.45 | 0.44        |
| V\$MITF        | 0.51  | 1.09   | 0.89 | 0.94 | 0.71        |
| V\$MOKF        | 1.55  | 1.73   | 1.27 | 0.79 | 1.12        |
| V\$MTF1        | 0.61  | 0.88   | 0.83 | 1.46 | 0.57        |
| V\$MYBL        | 1.17  | 0.98   | 0.93 | 0.96 | 1.23        |
| V\$MYOD        | 0.7   | 1.16   | 0.77 | 0.78 | 0.46        |
| V\$MYT1        | 1.02  | 0.88   | 1.25 | 0.98 | 0.72        |
| V\$MZF1        | 1.09  | 1.82   | 0.9  | 1.08 | 1.04        |
| V\$NBRE        | 0.81  | 1.39   | 1.21 | 0.58 | 1.13        |
| V\$NEUR        | 0.47  | 0.76   | 0.98 | 0.68 | 1.31        |
| V\$NF1F        | 1     | 0.94   | 1.01 | 0.83 | 0.88        |
| V\$NFAT        | 0.59  | 0.68   | 1.1  | 1.04 | 0.76        |
| V\$NFKB        | 0.76  | 2.06   | 1.1  | 0.95 | 1.23        |
| V\$NKX6        | 0.82  | 0.65   | 1.19 | 0.55 | 0.97        |
| V\$NKXH        | 1.02  | 0.91   | 1.06 | 0.99 | 0.98        |
| V\$NOLF        | 1.25  | 0.85   | 1.18 | 0.63 | 0.46        |
| V\$NR2F        | 1.02  | 0.75   | 1.1  | 0.79 | 0.83        |
| V\$NRF1        | 0.81  | 0.58   | 0.97 | 2.37 | 1.51        |
| V\$NRSF        | 0.52  | 0.48   | 0.96 | 1.3  | 0.42        |
| V\$OAZF        | 1.49  | 1.72   | 1.92 | 1.05 | 0.96        |
| V\$OCT1        | 1.05  | 0.45   | 0.91 | 0.74 | 1.15        |
| V\$OCTB        | 0.6   | 0      | 1.22 | 0.43 | 1.17        |
| V\$P53F        | 1.08  | 0.39   | 1.24 | 0.94 | 0.94        |
| V\$PARF        | 0.89  | 0.98   | 1.22 | 1.06 | 1.15        |
| V\$PAX1        | 1.5   | 2.42   | 1.63 | 2.1  | 0.53        |
| V\$PAX2        | 1.45  | 0.7    | 1.31 | 0.74 | 0.91        |
| V\$PAX3        | 1.22  | 1.2    | 1.14 | 1.19 | 1.09        |
| V\$PAX4        | 0     | 0      | 0    | 0    | 3.97        |
| V\$PAX5        | 0.86  | 0.52   | 1.19 | 1.14 | 1.07        |
| V\$PAX6        | 0.84  | 1.18   | 1.15 | 1.15 | 1.13        |
| V\$PAX8        | 1.48  | 2.13   | 0.73 | 0.75 | 1.38        |
| V\$PAX9        | 1.5   | 0.81   | 1.64 | 1.82 | 0.79        |
| V\$PBXC        | 1.15  | 1.02   | 0.76 | 0.82 | 1.32        |
| V\$PDX1        | 0.7   | 0.7    | 1.1  | 0.97 | 0.85        |
| V\$PERO        | 0.75  | 0.87   | 1    | 0.67 | 1.21        |
| V\$PIT1        | 1.08  | 0.33   | 0.58 | 0.78 | 0.65        |
| V\$PLAG        | 0.98  | 1.88   | 1.22 | 1.7  | 1.38        |
| V\$PLZF        | 1.27  | 0.46   | 1.59 | 0.76 | 0.89        |
| V\$PPAR        | 0.81  | 0.87   | 0.76 | 0.62 | 0.85        |
| V\$PRDF        | 0.92  | 0.57   | 1.21 | 0.8  | 1.01        |
| V\$PTF1        | 1.13  | 1.21   | 0.75 | 0.79 | 0.99        |
| V\$PURA        | 0.96  | 2.08   | 1.14 | 0.98 | 0.54        |
| V\$RBIT        | 0.4   | 0.21   | 1.3  | 0.61 | 1.11        |
| V\$RBP2        | 1.38  | 0      | 0.98 | 1    | 0.83        |
| V\$RBPB        | 1.34  | 1.36   | 1.23 | 0.88 | 0.77        |
| V\$RORA        | 0.92  | 0.52   | 1.05 | 0.74 | 0.95        |
| V\$RP58        | 0.58  | 1.24   | 1.14 | 1.27 | 1.08        |
| V\$RREB        | 1.22  | 1.9    | 0.63 | 1.21 | 1.05        |
| V\$RU49        | 0.99  | 0.3    | 1.1  | 1.15 | 0.79        |
| V\$RUSH        | 0.85  | 1.3    | 1.08 | 0.61 | 0.99        |
| V\$RXRF        | 1.1   | 0.76   | 1.05 | 0.84 | 1.16        |
| V\$SATB        | 0.72  | 0.39   | 1.09 | 0.82 | 0.75        |
| V\$SF1F        | 0.69  | 1.48   | 1.37 | 0.65 | 1.51        |
| V\$SMAD        | 0.74  | 1.42   | 0.92 | 1.05 | 1.04        |
| V\$SNAP        | 1.02  | 0.35   | 1.02 | 0.8  | 1.28        |
| V\$SORY        | 1.01  | 0.93   | 1.11 | 1.01 | 1.1         |
| V\$SP1F        | 1.03  | 2.04   | 1.17 | 1.38 | 1.26        |
| V\$SPZ1        | 0.97  | 1.14   | 0.91 | 1.26 | 0.74        |
| V\$SREB        | 1.59  | 1.47   | 0.96 | 1.04 | 1.11        |
| V\$SRFF        | 1.49  | 1.56   | 1.15 | 1.04 | 1.19        |
| V\$STAF        | 0.98  | 0.75   | 1.03 | 1    | 0.81        |
| V\$STAT        | 1.33  | 1.37   | 0.71 | 1.01 | 1.15        |
| V\$TALE        | 0.74  | 0.79   | 1.01 | 0.86 | 1.03        |
| V\$TCFF        | 0.37  | 1.47   | 1.03 | 0.38 | 1.55        |
| V\$TEAF        | 1.53  | 1      | 0.85 | 1.08 | 0.95        |
| V\$THAP        | 0.47  | 1.57   | 0.72 | 1.07 | 0.65        |
| V\$WHNF        | 0.42  | 0      | 0.87 | 1.59 | 0.44        |
| V\$XBBF        | 0.74  | 1.7    | 0.66 | 1.37 | 0.71        |
| V\$YBXF        | 0.55  | 1.49   | 1.42 | 1.06 | 1.36        |
| V\$YY1F        | 0.63  | 1.2    | 1.06 | 0.77 | 1.22        |
| V\$ZBPF        | 0.97  | 1.91   | 1.2  | 1.49 | 1.09        |
| V\$ZF35        | 0.72  | 1.55   | 0.76 | 1.32 | 1.61        |
| V\$ZF5F        | 0.62  | 0.36   | 1.45 | 2.01 | 0.71        |
| V\$ZFHX        | 0.85  | 0.71   | 0.83 | 0.77 | 0.99        |
| V\$ZFIA        | 1.09  | 0.94   | 0.95 | 1.11 | 1.22        |
| V\$ZNFP        | 1.03  | 1.38   | 1.08 | 1.31 | 1.26        |
