# Supplementary material for: Overrepresentation of transcription factor families in the genesets underlying breast cancer subtypes
Source: PubMed Central journal article supplement (PMC3441847; doi:10.1186/1471-2164-13-199), 2012-05-22
Supplement: 1471-2164-13-199-S11.pdf [file 1471-2164-13-199-S11.pdf]

Supplementary Table 4: Table displays the pearson's correlation between the geometric mean of expression values of transcription factor genes in subtypes and fold overrepresentation of corresponding TFBS families

| Gene Symbol | GeneName                                                                                                                       | TFBS families | Pearson's correlation |
|-------------|--------------------------------------------------------------------------------------------------------------------------------|---------------|-----------------------|
| SNFT        | Jun dimerization protein p21SNFT                                                                                               | V\$AP1F       | 0.37                  |
| FOS         | v-fos FBJ murine osteosarcoma viral oncogene homolog                                                                           | V\$AP1F       | 0.65                  |
| FOSB        | FBJ murine osteosarcoma viral oncogene homolog B                                                                               | V\$AP1F       | 0.83                  |
| FOSL2       | FOS-like antigen 2                                                                                                             | V\$AP1F       | 0.85                  |
| FOSL1       | FOS-like antigen 1                                                                                                             | V\$AP1F       | 0.43                  |
| JDP2        | jun dimerization protein 2                                                                                                     | V\$AP1F       | 0.48                  |
| JUN         | jun oncogene                                                                                                                   | V\$AP1F       | 0.74                  |
| JUNB        | jun B proto-oncogene                                                                                                           | V\$AP1F       | 0.72                  |
| JUNB        | jun B proto-oncogene                                                                                                           | V\$AP1F       | 0.66                  |
| ARID5B      | AT rich interactive domain 5B (MRF1-like)                                                                                      | V\$ARID       | -0.16                 |
| ARID5B      | AT rich interactive domain 5B (MRF1-like)                                                                                      | V\$ARID       | -0.07                 |
| ARID5B      | AT rich interactive domain 5B (MRF1-like)                                                                                      | V\$ARID       | 0.27                  |
| CUTL1       | cut-like 1, CCAAT displacement protein (Drosophila)                                                                            | V\$CLOX       | 0.14                  |
| CUTL2       | cut-like 2 (Drosophila)                                                                                                        | V\$CLOX       | -0.74                 |
| E2F1        | E2F transcription factor 1                                                                                                     | V\$E2FF       | 0.34                  |
| E2F2        | E2F transcription factor 2                                                                                                     | V\$E2FF       | 0.15                  |
| E2F3        | E2F transcription factor 3                                                                                                     | V\$E2FF       | -0.21                 |
| E2F4        | E2F transcription factor 4, p107/p130-binding                                                                                  | V\$E2FF       | -0.53                 |
| E2F4        | E2F transcription factor 4, p107/p130-binding                                                                                  | V\$E2FF       | -0.68                 |
| E2F5        | E2F transcription factor 5, p130-binding                                                                                       | V\$E2FF       | 0.81                  |
| E2F7        | E2F transcription factor 7                                                                                                     | V\$E2FF       | 0.37                  |
| E2F8        | E2F transcription factor 8                                                                                                     | V\$E2FF       | 0.18                  |
| TFDP1       | transcription factor Dp-1                                                                                                      | V\$E2FF       | -0.01                 |
| TFDP1       | transcription factor Dp-1                                                                                                      | V\$E2FF       | -0.05                 |
| ATF6        | activating transcription factor 6                                                                                              | V\$EBOX       | 0.88                  |
| CREBL1      | cAMP responsive element binding protein-like 1                                                                                 | V\$EBOX       | 0.49                  |
| MAX         | MYC associated factor X                                                                                                        | V\$EBOX       | 0.85                  |
| MGA         | MAX gene associated                                                                                                            | V\$EBOX       | -0.58                 |
| MLX         | MAX-like protein X                                                                                                             | V\$EBOX       | 0.26                  |
| MLXIPL      | MLX interacting protein-like                                                                                                   | V\$EBOX       | 0.78                  |
| MLXIPL      | MLX interacting protein-like                                                                                                   | V\$EBOX       | -0.83                 |
| MLXIPL      | MLX interacting protein-like                                                                                                   | V\$EBOX       | 0.76                  |
| MYC         | v-myc myelocytomatosis viral oncogene homolog (avian)                                                                          | V\$EBOX       | -0.38                 |
| MYCN        | v-myc myelocytomatosis viral related oncogene, neuroblastoma derived (avian)                                                   | V\$EBOX       | -0.35                 |
| TCF4        | transcription factor 4                                                                                                         | V\$EBOX       | -0.36                 |
| EGR1        | early growth response 1                                                                                                        | V\$EGRF       | -0.76                 |
| EGR2        | early growth response 2 (Krox-20 homolog, Drosophila)                                                                          | V\$EGRF       | -0.78                 |
| EGR3        | early growth response 3                                                                                                        | V\$EGRF       | -0.51                 |
| ZBTB7A      | zinc finger and BTB domain containing 7A                                                                                       | V\$EGRF       | 0.29                  |
| ZBTB7B      | zinc finger and BTB domain containing 7B                                                                                       | V\$EGRF       | -0.02                 |
| KLF2        | Kruppel-like factor 2 (lung)                                                                                                   | V\$EKLF       | -0.01                 |
| KLF2        | Kruppel-like factor 2 (lung)                                                                                                   | V\$EKLF       | -0.21                 |
| KLF3        | Kruppel-like factor 3 (basic)                                                                                                  | V\$EKLF       | -0.16                 |
| KLF4        | Kruppel-like factor 4 (gut)                                                                                                    | V\$EKLF       | -0.13                 |
| KLF6        | Kruppel-like factor 6                                                                                                          | V\$EKLF       | -0.34                 |
| KLF6        | Kruppel-like factor 6                                                                                                          | V\$EKLF       | -0.75                 |
| KLF6        | Kruppel-like factor 6                                                                                                          | V\$EKLF       | -0.21                 |
| KLF7        | Kruppel-like factor 7 (ubiquitous)                                                                                             | V\$EKLF       | 0.86                  |
| KLF8        | Kruppel-like factor 8                                                                                                          | V\$EKLF       | 0.09                  |
| KLF8        | Kruppel-like factor 8                                                                                                          | V\$EKLF       | -0.21                 |
| TRPS1       | trichorhinophalangeal syndrome I                                                                                               | V\$GATA       | 0.37                  |
| GATA2       | GATA binding protein 2                                                                                                         | V\$GATA       | -0.04                 |
| GATA3       | GATA binding protein 3                                                                                                         | V\$GATA       | 0.35                  |
| GATA6       | GATA binding protein 6                                                                                                         | V\$GATA       | -0.67                 |
| GATAD2A     | GATA zinc finger domain containing 2A                                                                                          | V\$GATA       | -0.31                 |
| GATAD1      | GATA zinc finger domain containing 1                                                                                           | V\$GATA       | 0.61                  |
| GATAD1      | GATA zinc finger domain containing 1                                                                                           | V\$GATA       | 0.50                  |
| GLI1        | glioma-associated oncogene homolog 1 (zinc finger protein)                                                                     | V\$GLIF       | -0.87                 |
| GLI2        | GLI-Kruppel family member GLI2                                                                                                 | V\$GLIF       | -0.84                 |
| GLI2        | GLI-Kruppel family member GLI2                                                                                                 | V\$GLIF       | -0.79                 |
| GLI3        | GLI-Kruppel family member GLI3 (Greig cephalopolysyndactyly syndrome)                                                          | V\$GLIF       | -0.10                 |
| GLIS1       | GLIS family zinc finger 1                                                                                                      | V\$GLIF       | -0.69                 |
| GLIS2       | GLIS family zinc finger 2                                                                                                      | V\$GLIF       | 0.17                  |
| ZIC1        | Zic family member 1 (odd-paired homolog, Drosophila)                                                                           | V\$GLIF       | -0.18                 |
| ZIC1        | Zic family member 1 (odd-paired homolog, Drosophila)                                                                           | V\$GLIF       | -0.22                 |
| ZIC4        | Zic family member 4                                                                                                            | V\$GLIF       | -0.02                 |
| ZIC5        | Zic family member 5 (odd-paired homolog, Drosophila)                                                                           | V\$GLIF       | -0.22                 |
| AR          | androgen receptor (dihydrotestosterone receptor; testicular feminization; spinal and bulbar muscular atrophy; Kennedy disease) | V\$GREF       | -0.09                 |
| NR3C1       | nuclear receptor subfamily 3, group C, member 1 (glucocorticoid receptor)                                                      | V\$GREF       | -0.48                 |

| Gene Symbol | GeneName                                                                                                                           | TFBS families | Pearson's correlation |
|-------------|------------------------------------------------------------------------------------------------------------------------------------|---------------|-----------------------|
| NR3C2       | nuclear receptor subfamily 3, group C, member 2                                                                                    | V\$GREF       | 0.12                  |
| PGR         | progesterone receptor                                                                                                              | V\$GREF       | -0.61                 |
| CBFA2T2     | core-binding factor, runt domain, alpha subunit 2; translocated to, 2                                                              | V\$HAML       | 0.38                  |
| CBFA2T3     | core-binding factor, runt domain, alpha subunit 2; translocated to, 3                                                              | V\$HAML       | -0.11                 |
| CBFB        | core-binding factor, beta subunit                                                                                                  | V\$HAML       | 0.48                  |
| CBFB        | core-binding factor, beta subunit                                                                                                  | V\$HAML       | 0.43                  |
| RUNX1       | runt-related transcription factor 1 (acute myeloid leukemia 1; aml1 oncogene)                                                      | V\$HAML       | -0.37                 |
| RUNX1T1     | runt-related transcription factor 1; translocated to, 1 (cyclin D-related)                                                         | V\$HAML       | -0.56                 |
| RUNX2       | runt-related transcription factor 2                                                                                                | V\$HAML       | -0.07                 |
| RUNX3       | runt-related transcription factor 3                                                                                                | V\$HAML       | 0.06                  |
| HOXA2       | homeobox A2                                                                                                                        | V\$HOXF       | -0.34                 |
| HOXA3       | homeobox A3                                                                                                                        | V\$HOXF       | -0.47                 |
| HOXA4       | homeobox A4                                                                                                                        | V\$HOXF       | -0.34                 |
| HOXA5       | homeobox A5                                                                                                                        | V\$HOXF       | -0.34                 |
| HOXB2       | homeobox B2                                                                                                                        | V\$HOXF       | 0.27                  |
| HOXB2       | homeobox B2                                                                                                                        | V\$HOXF       | 0.33                  |
| HOXB3       | homeobox B3                                                                                                                        | V\$HOXF       | 0.17                  |
| HOXB3       | homeobox B3                                                                                                                        | V\$HOXF       | 0.08                  |
| HOXB4       | homeobox B4                                                                                                                        | V\$HOXF       | -0.11                 |
| HOXB4       | homeobox B4                                                                                                                        | V\$HOXF       | -0.70                 |
| HOXB5       | homeobox B5                                                                                                                        | V\$HOXF       | 0.06                  |
| HOXB6       | homeobox B6                                                                                                                        | V\$HOXF       | 0.08                  |
| HOXB6       | homeobox B6                                                                                                                        | V\$HOXF       | 0.10                  |
| HOXB7       | homeobox B7                                                                                                                        | V\$HOXF       | -0.22                 |
| HOXB8       | homeobox B8                                                                                                                        | V\$HOXF       | 0.37                  |
| HOXC5       | homeobox C5                                                                                                                        | V\$HOXF       | 0.16                  |
| HOXD8       | homeobox D8                                                                                                                        | V\$HOXF       | -0.13                 |
| HOXA7       | homeobox A7                                                                                                                        | V\$HOXF       | -0.32                 |
| IRF1        | interferon regulatory factor 1                                                                                                     | V\$IRFF       | -0.40                 |
| IRF4        | interferon regulatory factor 4                                                                                                     | V\$IRFF       | -0.98                 |
| IRF4        | interferon regulatory factor 4                                                                                                     | V\$IRFF       | -0.88                 |
| IRF8        | interferon regulatory factor 8                                                                                                     | V\$IRFF       | -0.98                 |
| LHX2        | LIM homeobox 2                                                                                                                     | V\$LHXF       | -0.69                 |
| LHX6        | LIM homeobox 6                                                                                                                     | V\$LHXF       | -0.24                 |
| LMX1B       | LIM homeobox transcription factor 1, beta                                                                                          | V\$LHXF       | 0.68                  |
| MAZ         | MYC-associated zinc finger protein (purine-binding transcription factor)                                                           | V\$MAZF       | 0.15                  |
| MAZ         | MYC-associated zinc finger protein (purine-binding transcription factor)                                                           | V\$MAZF       | 0.03                  |
| PATZ1       | POZ (BTB) and AT hook containing zinc finger 1                                                                                     | V\$MAZF       | 0.49                  |
| PATZ1       | POZ (BTB) and AT hook containing zinc finger 1                                                                                     | V\$MAZF       | 0.55                  |
| PATZ1       | POZ (BTB) and AT hook containing zinc finger 1                                                                                     | V\$MAZF       | 0.58                  |
| SIX5        | sine oculis homeobox homolog 5 (Drosophila)                                                                                        | V\$MEF3       | -0.39                 |
| ZNF239      | zinc finger protein 239                                                                                                            | V\$MOKF       | -0.54                 |
| MYT1        | myelin transcription factor 1                                                                                                      | V\$MYT1       | 0.34                  |
| MZF1        | myeloid zinc finger 1                                                                                                              | V\$MZF1       | -0.48                 |
| HIVEP1      | human immunodeficiency virus type I enhancer binding protein 1                                                                     | V\$NFKB       | 0.21                  |
| HIVEP2      | human immunodeficiency virus type I enhancer binding protein 2                                                                     | V\$NFKB       | 0.38                  |
| HIVEP3      | human immunodeficiency virus type I enhancer binding protein 3                                                                     | V\$NFKB       | -0.75                 |
| NFKB2       | nuclear factor of kappa light polypeptide gene enhancer in B-cells 2 (p49/p100)                                                    | V\$NFKB       | 0.08                  |
| REL         | v-rel reticuloendotheliosis viral oncogene homolog (avian)                                                                         | V\$NFKB       | -0.58                 |
| RELB        | v-rel reticuloendotheliosis viral oncogene homolog B, nuclear factor of kappa light polypeptide gene enhancer in B-cells 3 (avian) | V\$NFKB       | -0.18                 |
| ZNF423      | zinc finger protein 423                                                                                                            | V\$OAZF       | -0.16                 |
